# Supplementary material
Source: PubMed Central journal article supplement (PMC6034646)

### **Supplementary statistical methods**

Best cut-point selection was based on cubic regression splines representing the modeled transformed outcome (log HR in blue in Supplementary Figure 1) as a function of a covariate. When a steep increase or decrease of the log HR was observed in an area where the 95% CI (in red) was narrow, the nearest threshold value located in a flat zone was selected (e.g. age or number of nodal sites). When no such inflexion was observed (e.g. hemoglobin level or platelet count) or when the inflexion was near a usual cut-off (e.g. albumin), previously used cut-points were kept. For  $\beta_2m$  where no inflexion was observed, both the UNL and the 3mg/L cut-off (used as a high tumor GELF criterion in some previous studies) were tested.

For Net Reclassification Improvement (NRI), a 5-yr time horizon and the continuous NRI were used. The overall NRI was reported in Table 3. The SAS macros from Professor Nancy Cook were used for NRI computation (<http://ncook.bwh.harvard.edu/sas-macros.html>).

For computing the Concordance Probability Estimates (CPE), we used the macro developed by Mithat Gönen, Qianxing Mo and Glenn Heller for SAS (<http://support.sas.com/publishing/bbu/60610/SASphcpe.zip>).

**Supplementary Table 1. Patient characteristics in the validation set**

|                                                              | FL2000 (N=175) | MER (N=304) | All (N=479) |
|--------------------------------------------------------------|----------------|-------------|-------------|
|                                                              | N (%)          | N (%)       | N (%)       |
| <b>Age &gt; 60 yrs</b>                                       | 89 (51)        | 136 (45)    | 225 (47)    |
| <b>Male sex</b>                                              | 96 (55)        | 165 (54)    | 261 (54)    |
| <b>ECOG &gt; 1</b>                                           | 11 (6)         | 13 (4)      | 24 (5)      |
| <b>Stage III-IV</b>                                          | 152 (87)       | 236 (79)    | 388 (81)    |
| <b>Nodal sites involvement &gt; 4</b>                        | 86 (49)        | 125 (44)    | 211 (44)    |
| <b>Bone marrow involvement</b>                               | 108 (62)       | 130 (46)    | 238 (50)    |
| <b>Extranodal sites involvement (other than bone marrow)</b> | 69 (40)        | 100 (33)    | 169 (35)    |
| <b>LDH &gt; UNL</b>                                          | 64 (37)        | 75 (27)     | 139 (29)    |
| <b>Hemoglobin &lt; 12 g/dL</b>                               | 37 (21)        | 54 (19)     | 91 (19)     |
| <b><math>\beta_2m</math> &gt; 3 mg/L</b>                     | 62 (38)        | 101 (33)    | 163 (34)    |
| <b>Induction treatment</b>                                   |                |             |             |
| R-CHOP                                                       | 0 (0)          | 121 (40)    | 121 (25)    |
| R-CVP                                                        | 0 (0)          | 68 (22)     | 68 (14)     |
| R-bendamustine                                               | 0 (0)          | 104 (34)    | 104 (22)    |
| R-CHVP+IFN                                                   | 175 (100)      | 0 (0)       | 175 (37)    |
| Others                                                       | 0 (0)          | 11 (4)      | 11 (2)      |
| <b>Maintenance<sup>s</sup></b>                               |                |             |             |
| Rituximab                                                    | 0 (0)          | 95 (31)     | 95 (20)     |
| IFN                                                          | 175 (100)      | 0 (0)       | 175 (36)    |
| None                                                         | 0 (0)          | 209 (69)    | 209 (44)    |

*Missing data: for the FL2000 cohort:  $\beta_2m$  (n=11), bone marrow involvement (n=1), LDH (n=4), stage (n=1), extranodal sites (n=3); for the MER cohort: ECOG (n=4), stage (n=7), nodal sites (n=21), bone marrow involvement (n=23), extranodal sites (n=6), LDH (n=22), hemoglobin (n=16).*

**Supplementary Table 2. Event-free survival at 24 months (EFS24) according to the PRIMA-PI or the FLIPI in the PRIMA cohort.**

|                     | FLIPI, n (%)   |                         | Statistics                                          | PRIMA-PI, n (%) |                         | Statistics                                           |
|---------------------|----------------|-------------------------|-----------------------------------------------------|-----------------|-------------------------|------------------------------------------------------|
|                     | Achieved EFS24 | Failed to achieve EFS24 |                                                     | Achieved EFS24  | Failed to achieve EFS24 |                                                      |
| <b>Low</b>          | 200 (84)       | 38 (16)                 | $\chi^2=22.27$<br>$\Phi_c=0.14$<br>$P=1.36*10^{-5}$ | 303 (86)        | 49 (14)                 | $\chi^2=55.48$<br>$\Phi_c=0.23$<br>$P=1.41*10^{-12}$ |
| <b>Intermediate</b> | 319 (79)       | 86 (21)                 |                                                     | 272 (79)        | 74 (21)                 |                                                      |
| <b>High</b>         | 337 (69)       | 150 (31)                |                                                     | 203 (62)        | 124 (38)                |                                                      |
| <b>Total</b>        | 856 (76)       | 274 (24)                |                                                     | 778 (76)        | 247 (24)                |                                                      |

$\Phi_c$ =Cramer's V, P is calculated from the Fisher's exact test.

**Supplementary Table 3. Event-free survival at 24 months (EFS24) according to the PRIMA-PI or the FLIPI in the validation cohort.**

|                     | FLIPI, n (%) |         | Statistics                                    | PRIMA-PI, n (%) |         | Statistics                                    |
|---------------------|--------------|---------|-----------------------------------------------|-----------------|---------|-----------------------------------------------|
|                     | EFS24-       | EFS24+  |                                               | EFS24-          | EFS24+  |                                               |
| <b>Low</b>          | 112 (89)     | 14 (11) |                                               | 151 (90)        | 17 (10) |                                               |
| <b>Intermediate</b> | 133 (84)     | 26 (16) | $\chi^2=13.21$<br>$\Phi_c=0.17$<br>$P=0.0016$ | 112 (82)        | 24 (18) | $\chi^2=18.24$<br>$\Phi_c=0.20$<br>$P=0.0001$ |
| <b>High</b>         | 120 (73)     | 45 (27) |                                               | 113 (72)        | 45 (28) |                                               |
| <b>Total</b>        | 365 (81)     | 85 (19) |                                               | 376 (81)        | 86 (19) |                                               |

$\Phi_c$ =Cramer's V, P is calculated from the Fisher's exact test.

**Supplementary Figure 1. Cox regression splines analysis for best cut-off determination of continuous parameters.**

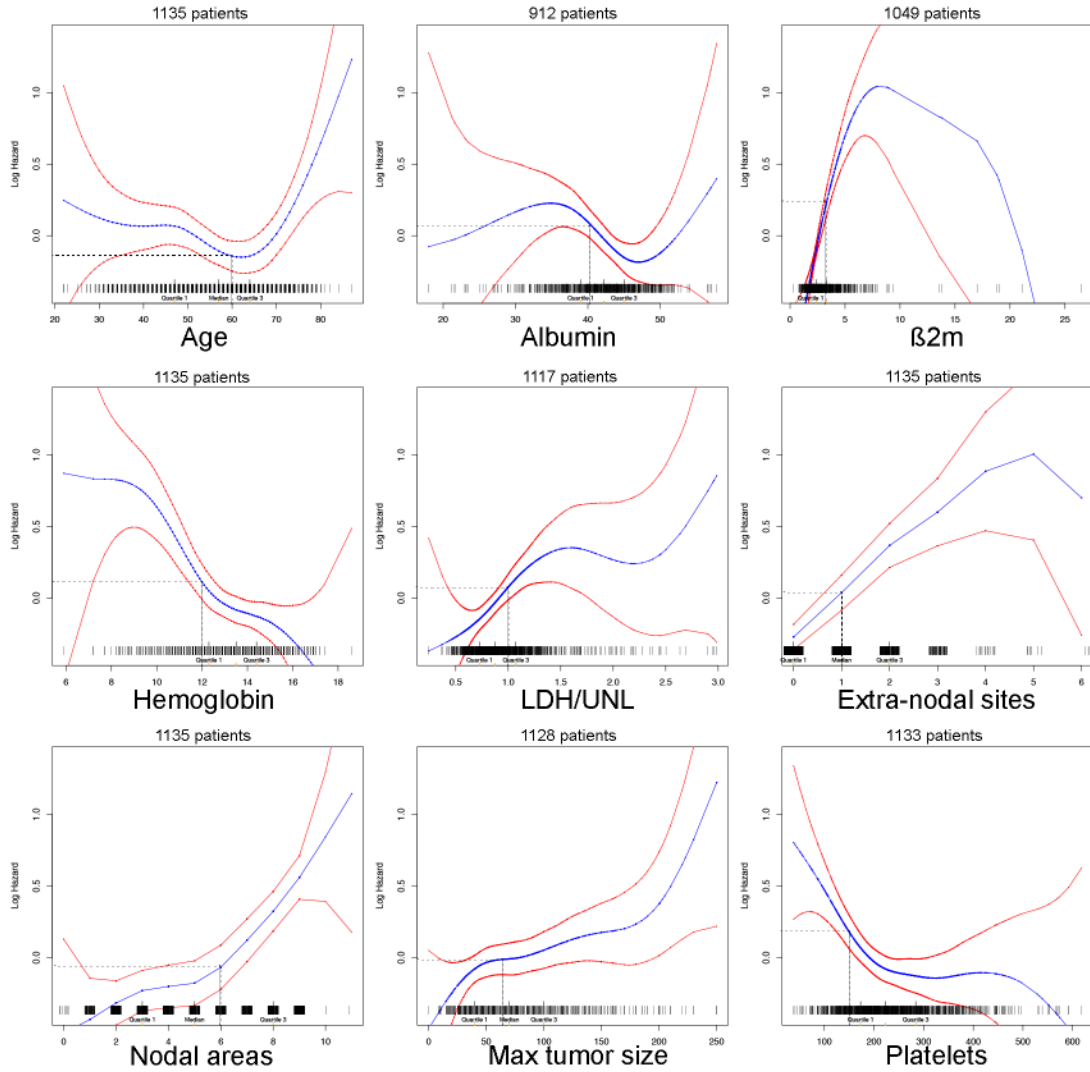

**Supplementary Figure 2.** (A-D) PFS according to the four scores in the observation arm of the PRIMA study. (E-H) PFS according to the four scores in the rituximab maintenance arm of the PRIMA study.

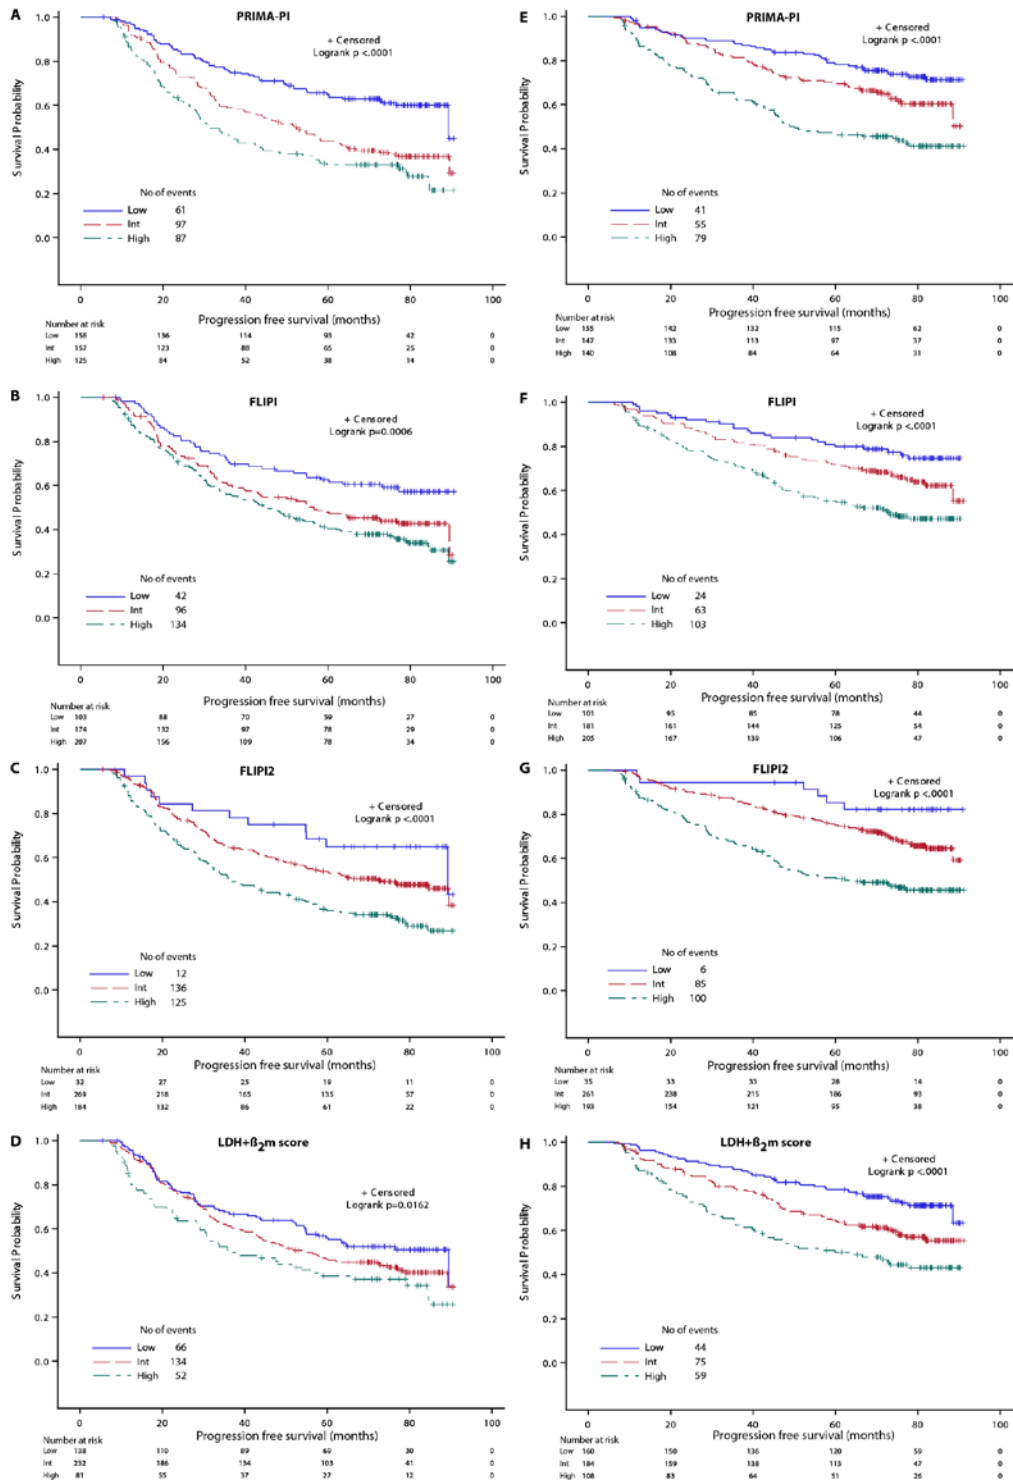

**Supplementary Figure 3. Survival in the training cohort.** (A) OS according to the PRIMA-PI. (B) OS according to the FLIPI. (C) Lymphoma-specific survival according to the PRIMA-PI. (D) Lymphoma-specific survival according to the FLIPI.

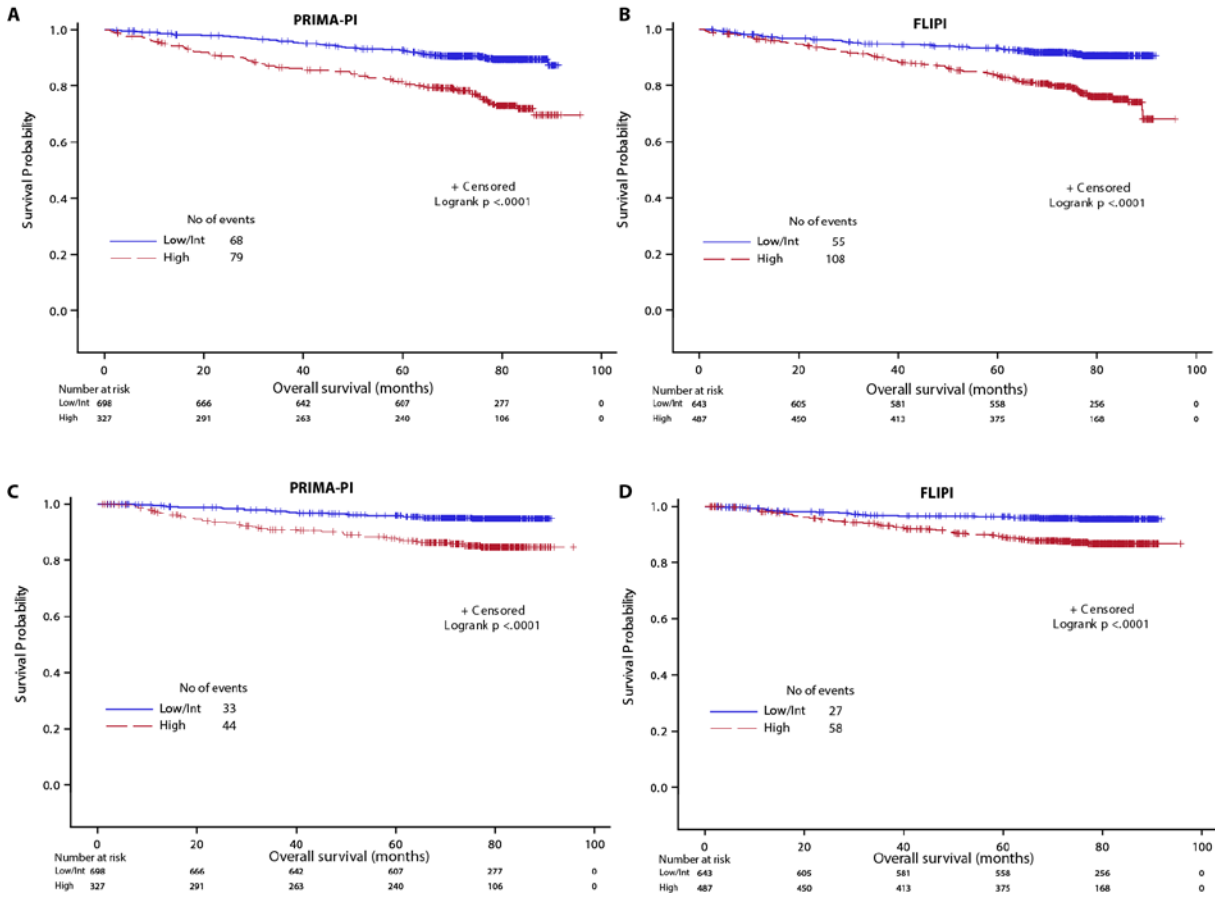

Supplement: blood816405-suppl1.pdf [file blood816405-suppl1.pdf]
